# Supplementary material
Source: publisher figshare collection journal article supplement (https://frontiersin.figshare.com/ndownloader/files/19781324)

Figure S3

A

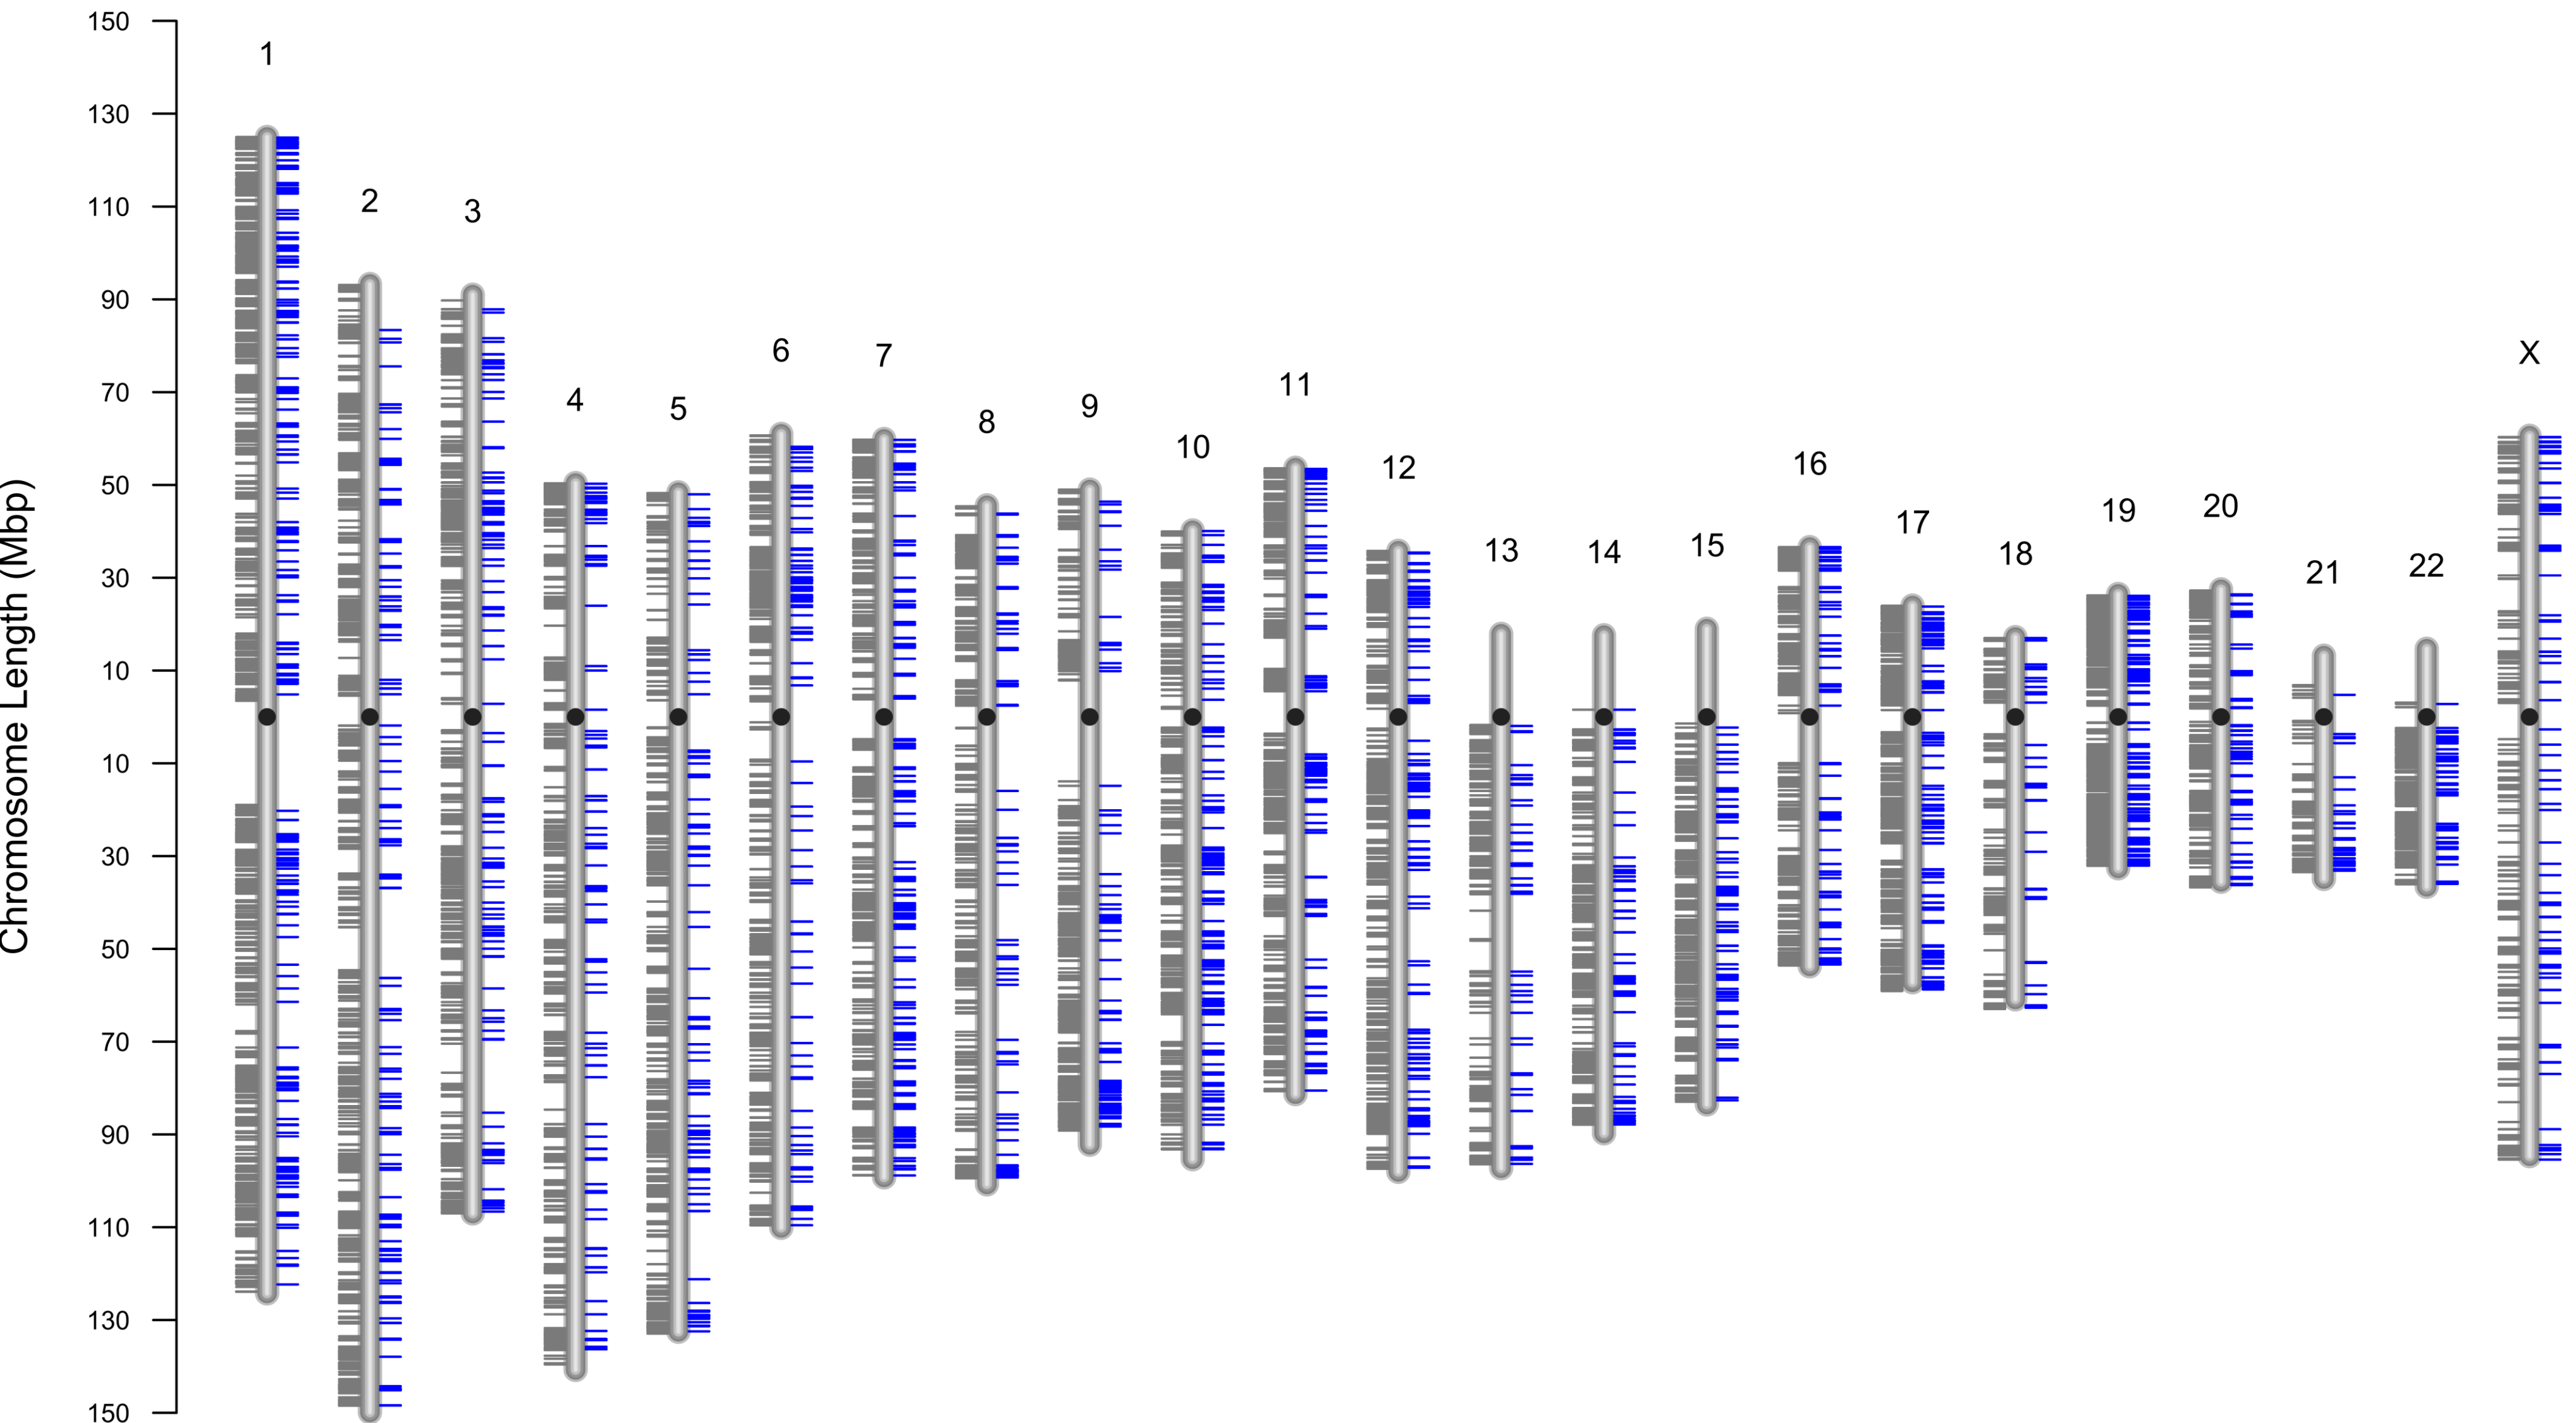

B

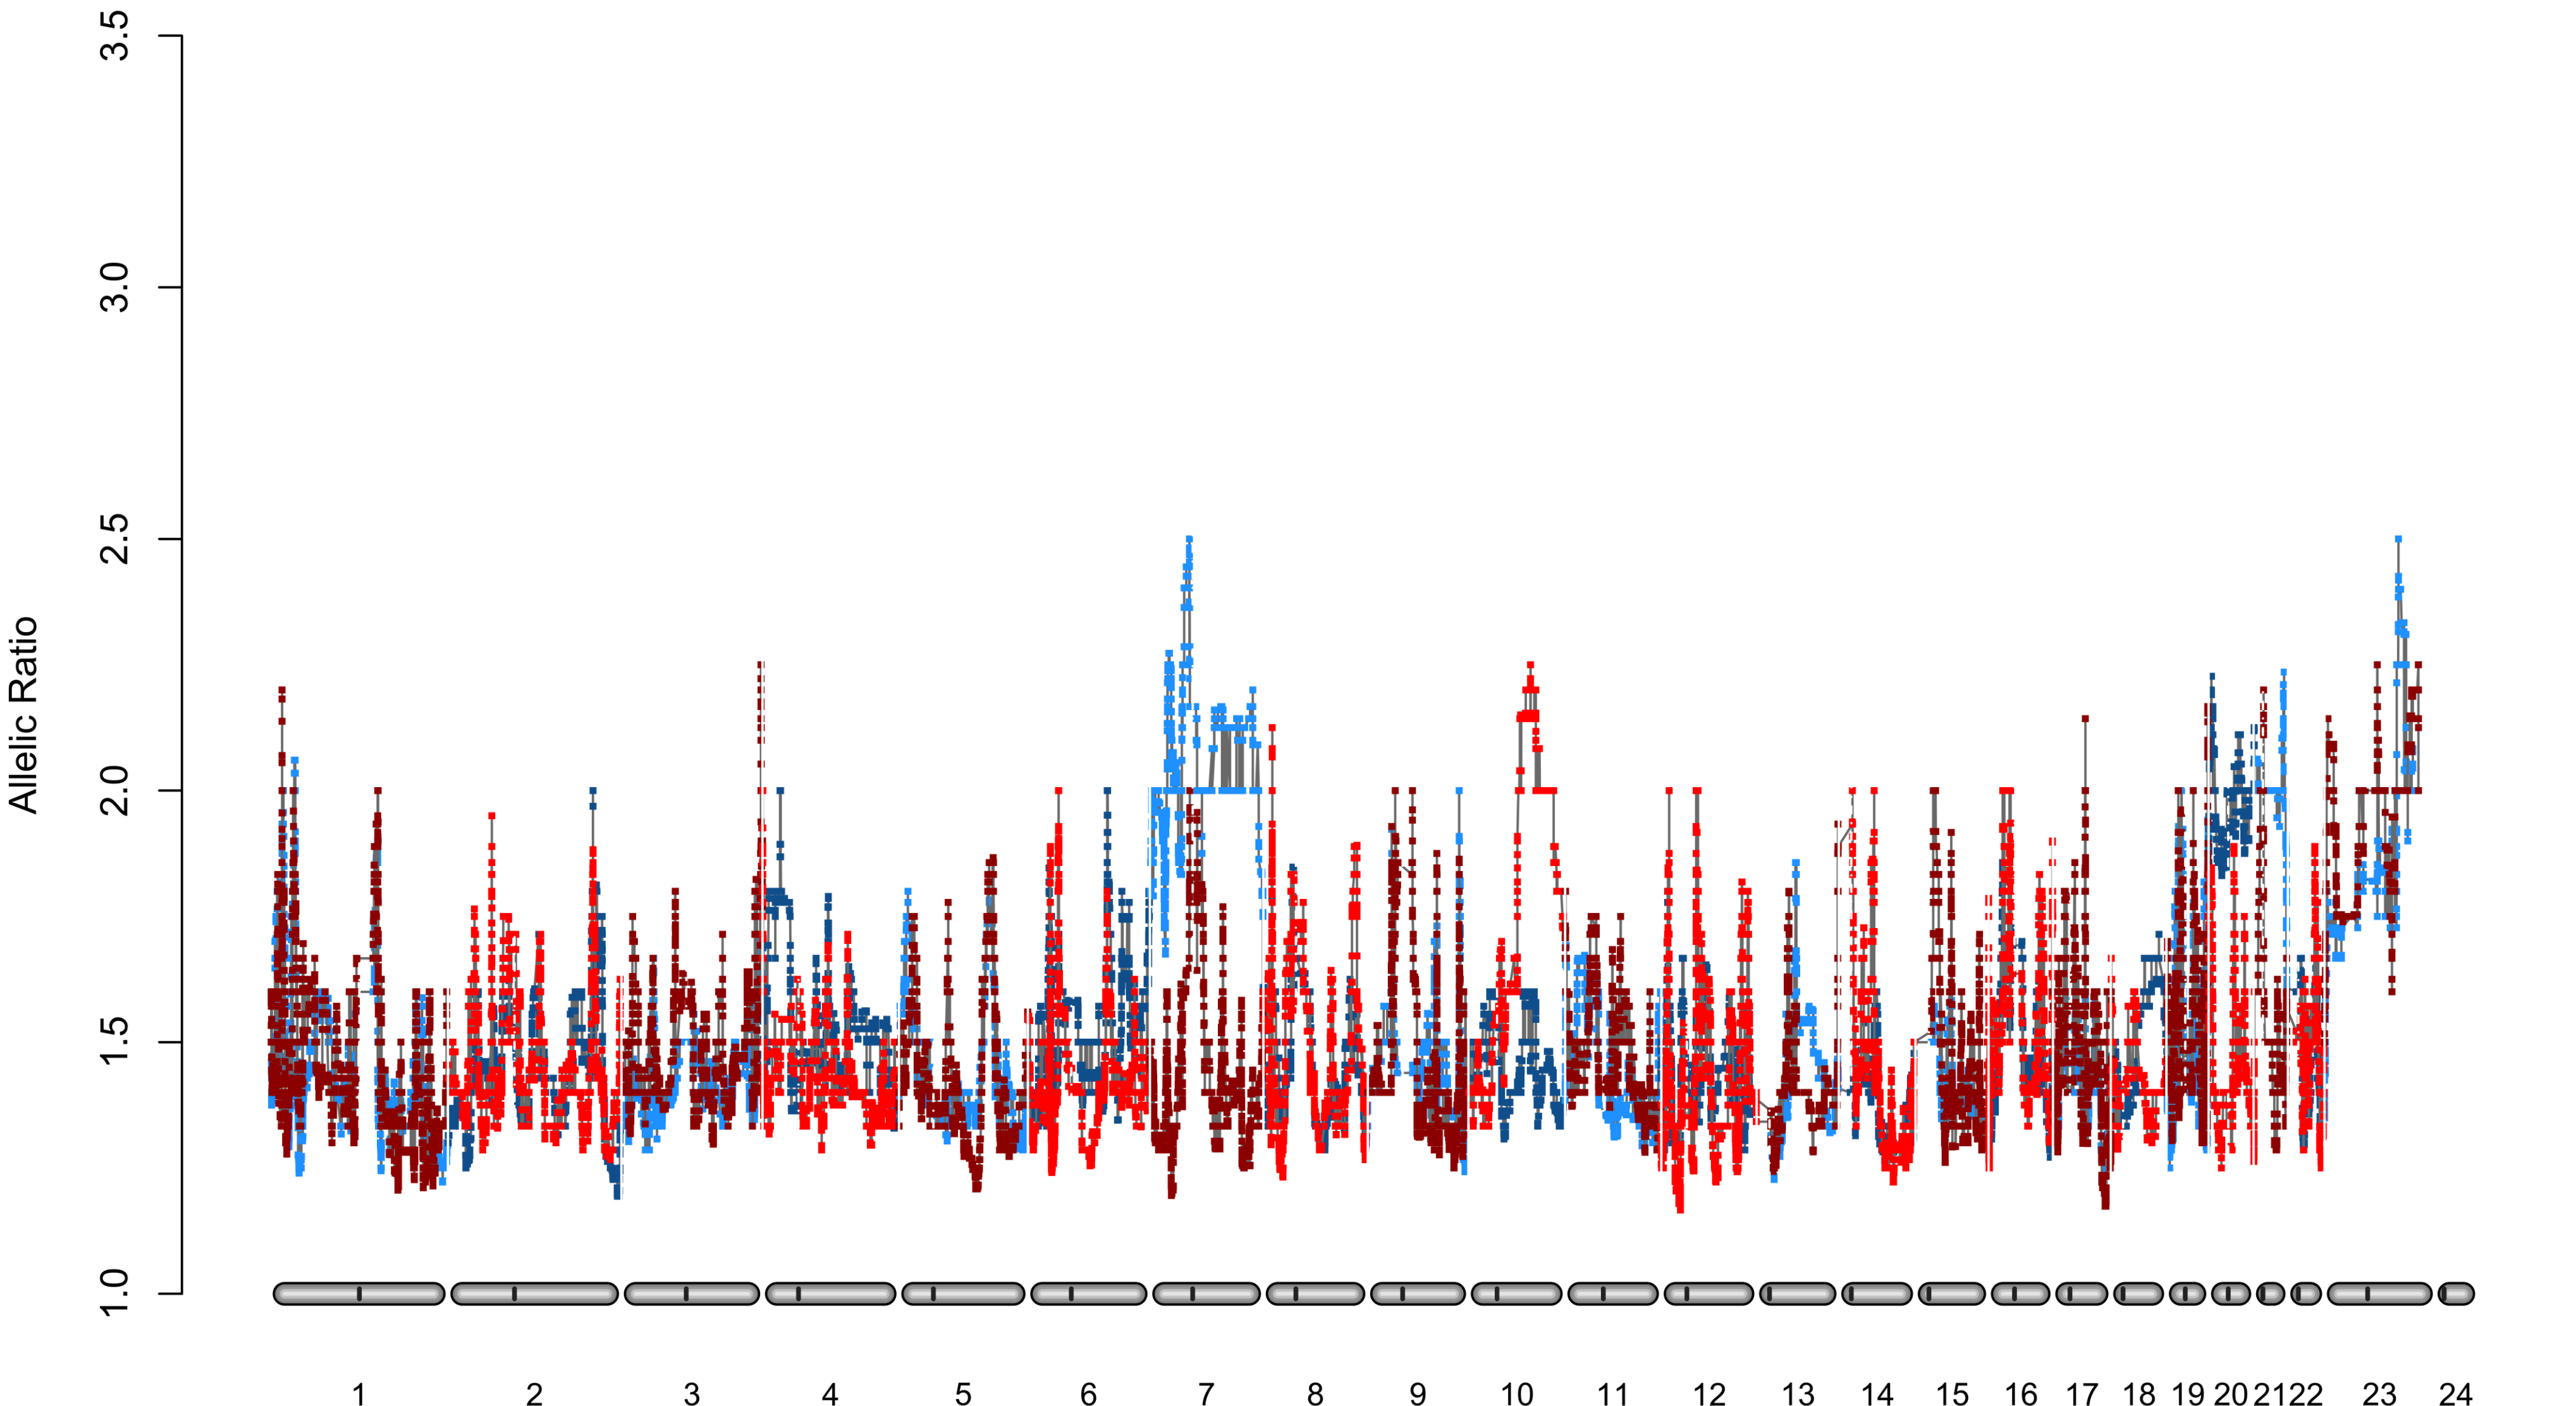

Supplement: Supplementary file [file 19781324]
